# Supplementary material for: SEC14-like condensate phase transitions at plasma membranes regulate root growth in Arabidopsis
Source: PubMed Central journal article supplement (PMC10538751; doi:10.1371/journal.pbio.3002305), 2023-09-18

# Figure 1

Panel A x x

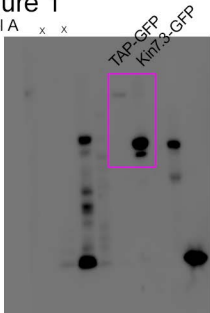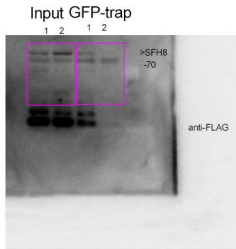

1: GFP-Kin7.3  
2: GFP-TAP

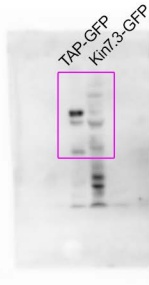

# Figure 3

Panel A

anti-FLAG

*rsw4* *K135*

X 2 1 2 1 WT

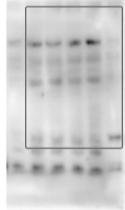

-100

-70

-40

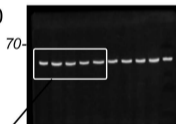

anti-tubulin

*sfh8*

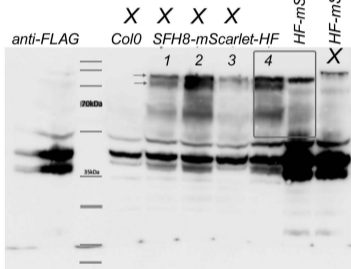

X X X X

anti-FLAG

Col0

SFH8-mScarlet-HF

1

2

3

4

HF-mScarlet-SFH8

HF-mScarlet-SFH8-mNeon

X

70kDa

35kDa

cleavage product (HF-mScarlet)

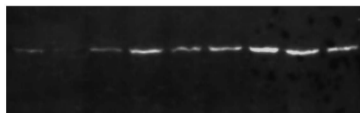

anti-tubulin

70-

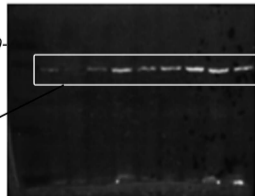

# Figure S3

Panel B  
Same blots

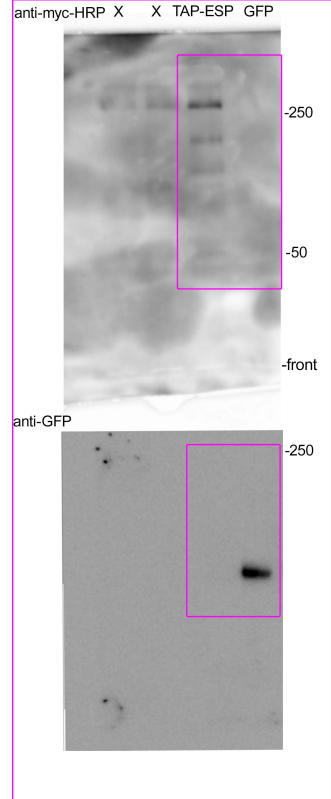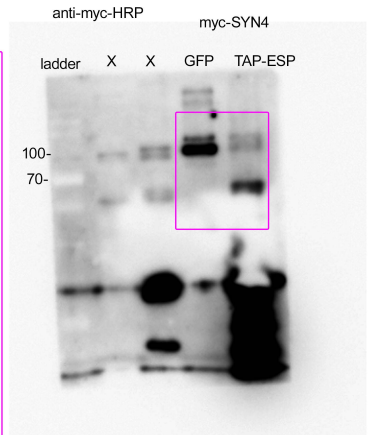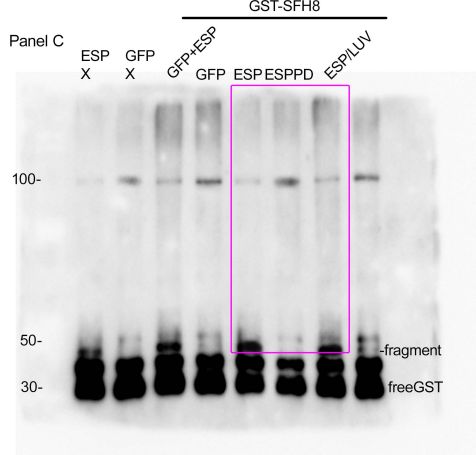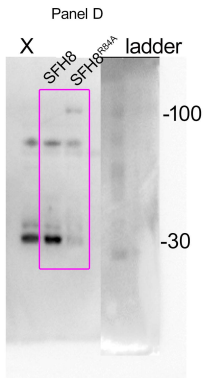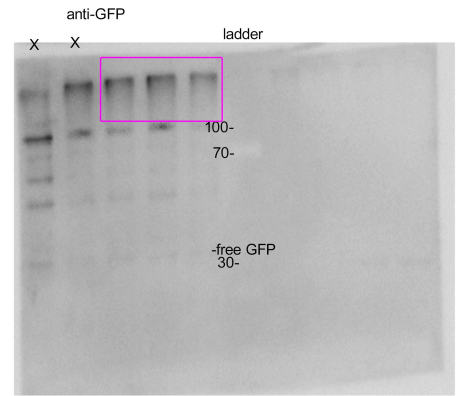

Figure S6

Panel A

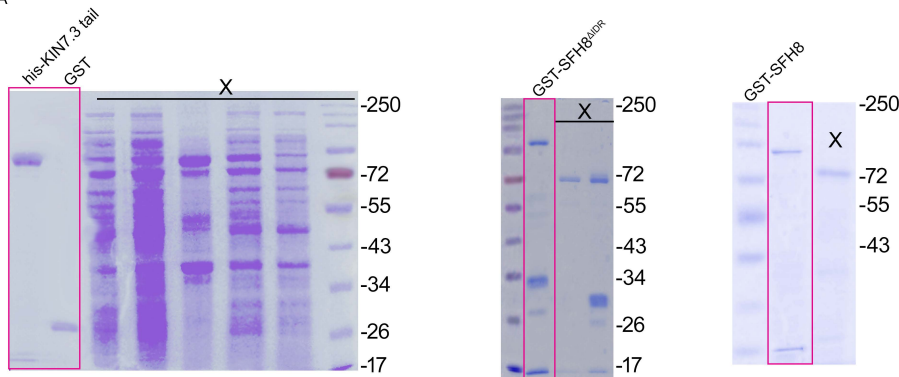

Panel E

anti-GST

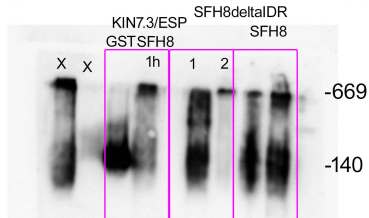

anti-His

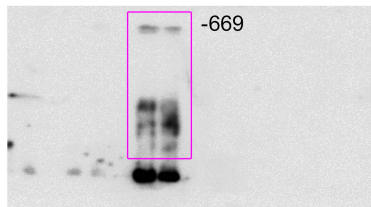

Supplement: pbio.3002305.s010.pdf [file pbio.3002305.s010.pdf]
