# Supplementary material for: SEC14-like condensate phase transitions at plasma membranes regulate root growth in Arabidopsis
Source: PLoS Biol. 2023 Sep 18;21(9):e3002305. doi: 10.1371/journal.pbio.3002305 (PMC10538751; doi:10.1371/journal.pbio.3002305)
Supplement: S1 File — (PDF) [file pbio.3002305.s006.pdf]

|                                                                                                                         |   |   |   |   |   |   |   |   |   |   |   |   |   |   |   |   |   |   |   |   |   |   |   |   |   |   |   |   |   |   |   |   |   |   |   |   |   |   |   |   |   |   |   |   |   |   |   |   |   |   |   |   |   |   |   |   |   |   |   |   |   |   |   |   |   |   |   |   |   |   |   |   |   |   |   |
|-------------------------------------------------------------------------------------------------------------------------|---|---|---|---|---|---|---|---|---|---|---|---|---|---|---|---|---|---|---|---|---|---|---|---|---|---|---|---|---|---|---|---|---|---|---|---|---|---|---|---|---|---|---|---|---|---|---|---|---|---|---|---|---|---|---|---|---|---|---|---|---|---|---|---|---|---|---|---|---|---|---|---|---|---|---|
| 89. XP_003527684.2 phosphatidylinositol/phosphatidylcholine transfer protein SFH6 Glycine max                           | S | L | - | - | K | K | K | A | L | F | A | S | T | K | F | R | H | S | F | - | K | K | K | R | S | - | - | R | - | K | I | - | D | - | - | S | R | S | - | N | S | L | S | I | E | D | V | R | D | V | K | D | L | Q | A | V | D | A | F | R | Q | A | L | V | L | D | N | M | L | P | P | I | H |   |   |
| 90. XP_003527164.1 phosphatidylinositol/phosphatidylcholine transfer protein SFH6 Glycine max                           | S | L | - | - | K | K | K | A | L | N | A | S | S | K | F | K | H | T | L | - | R | K | K | S | S | - | - | R | R | K | S | - | D | - | - | G | R | V | - | S | S | V | S | I | E | D | V | R | D | F | E | E | L | Q | A | V | D | A | F | R | Q | S | L | I | M | D | E | L | L | P | E | A | F |   |   |
| 91. XP_003523568.2 phosphatidylinositol/phosphatidylcholine transfer protein SFH6 isoform X1 Glycine max                | S | L | - | - | K | K | K | A | L | Y | A | S | A | K | F | R | H | S | F | - | K | K | K | R | S | - | - | R | - | K | I | - | D | - | - | S | R | S | - | N | S | L | S | I | E | D | V | R | D | V | K | D | I | Q | A | V | D | A | F | R | Q | A | L | V | L | D | N | L | L | T | P | I | H |   |   |
| 92. XP_003522898.1 phosphatidylinositol/phosphatidylcholine transfer protein SFH6 Glycine max                           | S | L | - | - | K | K | K | A | L | N | A | S | S | K | F | K | H | T | L | - | R | K | K | S | S | - | - | R | R | K | S | - | D | - | - | G | R | V | - | S | S | V | S | I | E | D | V | R | D | F | E | E | L | Q | A | V | D | A | F | R | Q | S | L | I | M | D | E | L | L | P | E | A | F |   |   |
| 93. XP_002866832.1 phosphatidylinositol/phosphatidylcholine transfer protein SFH6 Arabidopsis lyrata subsp. lyrata      | S | L | - | - | K | K | K | A | I | N | A | S | T | K | F | K | H | S | L | - | K | K | K | - | - | - | - | R | R | K | S | - | D | - | - | V | R | V | - | S | S | V | S | I | E | D | V | R | D | V | E | E | L | Q | A | V | D | E | F | R | Q | A | L | V | M | E | E | L | L | P | H | K | H |   |   |
| 94. XP_002512943.1 phosphatidylinositol/phosphatidylcholine transfer protein SFH8 isoform X2 Ricinus communis           | S | L | - | - | K | K | K | A | I | N | A | S | T | K | F | K | H | S | L | - | K | K | K | S | N | - | - | R | R | K | S | - | D | - | - | G | R | V | - | S | S | V | S | I | E | D | V | R | D | V | E | E | L | Q | A | V | D | E | F | R | Q | A | L | I | M | D | E | L | L | P | E | R | H |   |   |
| 95. XP_002468412.2 phosphatidylinositol/phosphatidylcholine transfer protein SFH13 isoform X1 Sorghum bicolor           | S | L | - | - | K | K | K | A | L | N | A | S | N | K | L | T | H | S | L | - | K | K | R | G | - | - | - | K | R | K | V | - | E | - | - | H | R | A | - | S | S | F | T | I | E | D | V | R | D | E | Q | E | E | R | A | V | F | T | F | Q | Q | E | L | L | N | R | N | L | L | P | D | K | H |   |   |
| 96. XP_002460425.1 phosphatidylinositol/phosphatidylcholine transfer protein SFH6 Sorghum bicolor                       | S | L | - | - | P | R | K | A | I | - | - | - | - | - | - | - | H | A | L | R | K | K | R | A | - | - | - | R | R | R | V | T | D | - | - | F | R | F | P | - | A | A | I | S | I | E | D | V | R | D | A | E | E | E | R | A | V | A | A | F | R | D | R | L | A | A | H | R | L | L | P | D | K | H |   |
| 97. XP_002453900.1 phosphatidylinositol/phosphatidylcholine transfer protein SFH3 isoform X2 Sorghum bicolor            | S | L | - | - | K | K | K | A | M | S | A | S | Q | K | F | R | H | S | M | - | - | K | R | G | - | - | - | - | - | - | - | - | - | - | S | K | V | - | M | S | I | S | I | L | D | D | R | E | P | E | E | V | Q | A | V | D | A | F | R | Q | L | L | V | L | E | E | L | L | P | S | Q | H |   |   |   |
| 98. XP_002453266.1 phosphatidylinositol/phosphatidylcholine transfer protein SFH12 isoform X3 Sorghum bicolor           | S | L | - | - | R | H | R | A | M | S | A | S | S | K | L | L | R | S | S | L | S | R | K | S | M | - | - | G | R | R | S | - | - | - | S | K | V | - | M | S | V | S | I | E | D | V | R | D | A | E | E | M | K | Q | V | D | A | F | R | Q | T | L | V | L | E | E | L | L | P | A | R | H |   |   |   |
| 99. XP_002452636.1 phosphatidylinositol/phosphatidylcholine transfer protein SFH9 isoform X2 Sorghum bicolor            | S | L | - | - | R | K | K | A | L | H | A | S | T | R | L | T | H | S | L | - | K | K | R | G | - | - | - | K | R | K | V | - | D | - | - | C | R | V | - | P | R | I | A | I | E | D | V | R | D | A | E | E | E | Q | A | V | S | S | F | R | E | V | L | F | A | R | G | L | L | P | V | K | H |   |   |
| 100. XP_002451489.2 phosphatidylinositol/phosphatidylcholine transfer protein SFH6 isoform X1 Sorghum bicolor           | S | L | - | - | K | K | K | A | I | D | A | S | T | K | I | R | H | S | L | - | K | K | N | - | - | - | - | R | R | K | S | - | G | - | - | S | R | V | - | L | S | V | S | I | E | D | V | R | D | L | E | E | L | Q | A | V | E | A | F | R | Q | A | L | L | D | E | L | L | P | A | R | H |   |   |   |
| 101. XP_002445947.1 phosphatidylinositol/phosphatidylcholine transfer protein SFH13 Sorghum bicolor                     | S | L | - | - | R | R | K | A | I | - | - | - | - | - | - | - | H | A | L | - | K | K | R | G | - | - | - | R | R | R | V | - | D | - | - | F | R | F | P | P | - | A | A | I | S | I | E | D | V | R | D | A | E | E | E | R | A | V | S | F | R | E | R | L | A | A | H | G | L | L | P | E | K | H |   |
| 102. XP_002300755.3 phosphatidylinositol/phosphatidylcholine transfer protein SFH8 isoform X1 Populus trichocarpa       | S | L | - | - | K | R | K | A | M | K | A | S | S | K | L | R | R | S | L | - | T | K | S | K | K | - | - | K | G | T | G | - | - | - | G | C | G | G | E | G | - | V | S | A | A | I | E | D | V | R | D | V | E | E | L | R | V | V | D | S | F | K | Q | L | L | M | A | D | D | L | L | P | A | R | H |
| 103. XP_002283681.2 PREDICTED: phosphatidylinositol/phosphatidylcholine transfer protein SFH8 isoform X2 Vitis vinifera | S | L | - | - | K | K | K | A | I | N | A | S | T | K | F | K | H | S | L | - | K | K | K | S | S | - | - | R | R | K | S | - | D | - | - | G | R | V | - | S | S | V | S | I | E | D | V | R | D | V | E | E | L | E | A | V | D | A | F | R | Q | A | L | I | L | D | E | L | L | P | T | K | H |   |   |
| 104. XP_002281429.1 PREDICTED: phosphatidylinositol/phosphatidylcholine transfer protein SFH8 Vitis vinifera            | N | L | - | - | K | K | K | A | I | N | A | S | S | K | F | K | H | S | L | - | K | K | K | G | - | - | - | R | R | K | S | - | H | - | - | D | H | L | - | L | S | V | S | I | K | D | V | R | D | V | E | E | L | Q | A | V | E | A | F | R | Q | A | L | I | S | D | D | L | L | P | D | R | H |   |   |
| 105. VYS65373.1 unnamed protein product Arabidopsis thaliana                                                            | S | L | - | - | K | K | K | A | I | N | A | S | T | K | F | K | H | S | L | - | K | K | K | - | - | - | - | R | R | K | S | - | D | - | - | V | R | V | - | S | S | V | S | I | E | D | V | R | D | V | E | E | L | Q | A | V | D | E | F | R | Q | A | L | V | M | E | E | L | L | P | H | K | H |   |   |
| 106. VYS46602.1 unnamed protein product Arabidopsis thaliana                                                            | G | I | - | - | L | K | K | K | S | S | K | S | K | F | R | H | S | L | - | K | R | R | G | - | - | - | - | S | R | S | I | - | - | - | D | R | T | - | - | L | S | L | T | F | E | D | I | H | D | A | E | E | L | R | Y | V | S | E | F | R | Q | S | L | I | S | D | H | L | L | P | P | N | L |   |   |
| 107. RVX15050.1 Phosphatidylinositol/phosphatidylcholine transfer protein SFH8 Vitis vinifera                           | N | L | - | - | K | K | K | A | I | N | A | S | S | K | F | K | H | S | L | - | K | K | K | G | - | - | - | R | R | K | S | - | H | - | - | D | H | L | - | L | S | V | S | I | K | D | V | R | D | V | E | E | L | Q | A | V | E | A | F | R | Q | A | L | I | S | D | D | L | L | P | D | R | H |   |   |
| 108. RVW48317.1 Phosphatidylinositol/phosphatidylcholine transfer protein SFH6 Vitis vinifera                           | S | L | - | - | K | K | K | A | I | N | A | S | T | K | F | K | H | S | L | - | K | K | K | S | S | - | - | R | R | K | S | - | D | - | - | G | R | V | - | S | S | V | S | I | E | D | V | R | D | V | E | E | L | E | A | V | D | A | F | R | Q | A | L | I | L | D | E | L | L | P | T | K | H |   |   |
| 109. PWZ34728.1 Phosphatidylinositol/phosphatidylcholine transfer protein SFH6 Zea mays                                 | S | F | - | - | K | K | R | A | V | T | V | G | Y | K | F | R | H | S | L | - | W | R | K | S | - | - | - | K | M | K | N | - | D | - | - | - | N | - | H | V | A | S | I | E | D | I | R | D | G | Q | E | L | E | I | V | E | R | F | R | E | C | L | I | D | E | G | L | L | P | E | H | H |   |   |   |
| 110. PWZ29075.1 Phosphatidylinositol/phosphatidylcholine transfer protein SFH8 partial Zea mays                         | S | L | - | - | K | K | K | A | I | D | A | S | T | K | I | R | H | S | L | - | K | - | K | T | - | - | - | R | R | K | S | - | G | - | - | S | R | V | - | L | S | V | S | I | E | D | V | R | D | L | E | E | L | Q | A | V | E | A | F | R | Q | A | L | L | D | E | L | L | P | A | R | H |   |   |   |
| 111. PWZ20866.1 Phosphatidylinositol/phosphatidylcholine transfer protein SFH12 Zea mays                                | S | L | - | - | R | H | R | A | M | S | A | S | S | K | L | L | R | S | S | L | S | R | K | S | M | - | - | G | R | R | S | - | - | - | - | S | K | V | - | M | S | V | S | I | E | D | V | R | D | A | E | E | M | K | Q | V | D | A | F | R | Q | T | L | V | L | E | E | L | L | P | A | R | H |   |   |
| 112. PWZ18536.1 Phosphatidylinositol/phosphatidylcholine transfer protein SFH6 Zea mays                                 | S | F | - | - | K | K | K | A | I | N | A | G | N | K | F | R | H | S | L | - | R | R | R | S | - | - | - | K | K | K | T | - | E | - | - | - | R | G | D | S | I | K | D | I | R | D | V | K | E | L | Q | D | V | E | T | F | R | Q | C | L | I | D | E | D | L | L | P | P | Q | H |   |   |   |   |   |
| 113. PNT66410.1 hypothetical protein BRADI_3g11197v3 Brachypodium distachyon                                            | S | L | - | - | K | K | K | A | I | N | A | S | N | K | F | K | H | S | L | - | K | K | T | S | - | - | - | R | R | K | S | - | E | - | - | S | R | G | - | H | S | I | S | I | E | D | V | R | D | F | E | E | L | Q | T | V | D | A | F | R | Q | S | L | I | L | D | E | L | L | P | A | K | H |   |   |
| 114. PNT20929.1 hypothetical protein POPTR_009G119500 Populus trichocarpa                                               | S | L | - | - | K | K | K | A | L | N | A | S | T | K | F | K | H | S | L | - | K | K | K | S | - | - | - | - | R | R | K | G | - | D | - | - | G | R | V | - | S | S | V | S | I | E | D | V | R | D | V | E | E | L | Q | A | V | D | R | F | R | Q | T | L | V | M | D | E | L | L | P | E | R | H |   |
| 115. OQU85018.1 hypothetical protein SORBI_3004G158100 Sorghum bicolor                                                  | S | L | - | - | K | K | K | A | M | S | A | S | Q | K | F | R | H | S | M | - | K | R | - | G | - | - | - | - | R | K | S | - | - | - | - | S | K | V | - | M | S | I | S | I | L | D | D | R | E | P | E | E | V | Q | A | V | D | A | F | R | Q | L | L | V | L | E | E | L | L | P | S | Q | H |   |   |
| 116. OQU84321.1 hypothetical protein SORBI_3004G031900 Sorghum bicolor                                                  | - | - | - | - | - | - | - | - | - | - | - | - | - | - | - | - | - | - | - | - | - | - | - | - | - | - | M | G | R | R | S | - | - | - | - | S | K | V | - | M | S | V | S | I | E | D | V | R | D | A | E | E | M | K | Q | V | D | A | F | R | Q | T | L | V | L | E | E | L | L | P | A | R | H |   |   |
| 117. OQU84320.1 hypothetical protein SORBI_3004G031900 Sorghum bicolor                                                  | - | - | - | - | - | - | - | - | - | - | - | - | - | - | - | - | - | - | - | - | - | - | - | - | - | - | M | G | R | R | S | - | - | - | - | - | S | K | V | - | M | S | V | S | I | E | D | V | R | D | A | E | E | M | K | Q | V | D | A | F | R | Q | T | L | V | L | E | E | L | L | P | A | R | H |   |
| 118. OQU84319.1 hypothetical protein SORBI_3004G031900 Sorghum bicolor                                                  | - | - | - | - | - | - | - | - | - | - | - | - | - | - | - | - | - | - | - | - | - | - | - | - | - | - | - | G | R | R | S | - | - | - | - | - | - | S | K | V | - | M | S | V | S | I | E | D | V | R | D | A | E | E | M |   |   |   |   |   |   |   |   |   |   |   |   |   |   |   |   |   |   |   |   |
